# Supplementary material
Source: MDPI journal article supplement (https://www.mdpi.com/2075-4701/6/11/274)
Supplement: s1 [file s1]

Supplementary Materials: The Effect of Thermal Cycling Treatments on the Thermal Stability and Mechanical Properties of a Ti-Based Bulk Metallic Glass Composite

Fan Bu, Jun Wang, Liyuan Li, Hongchao Kou, Xiangyi Xue and Jinshan Li


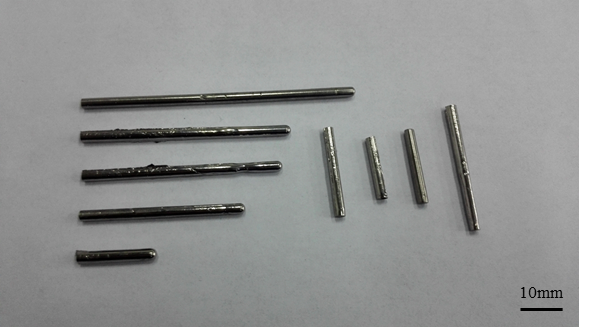


**Figure S1.** Casting rods prepared by arc melting and cooper mold suck cast.


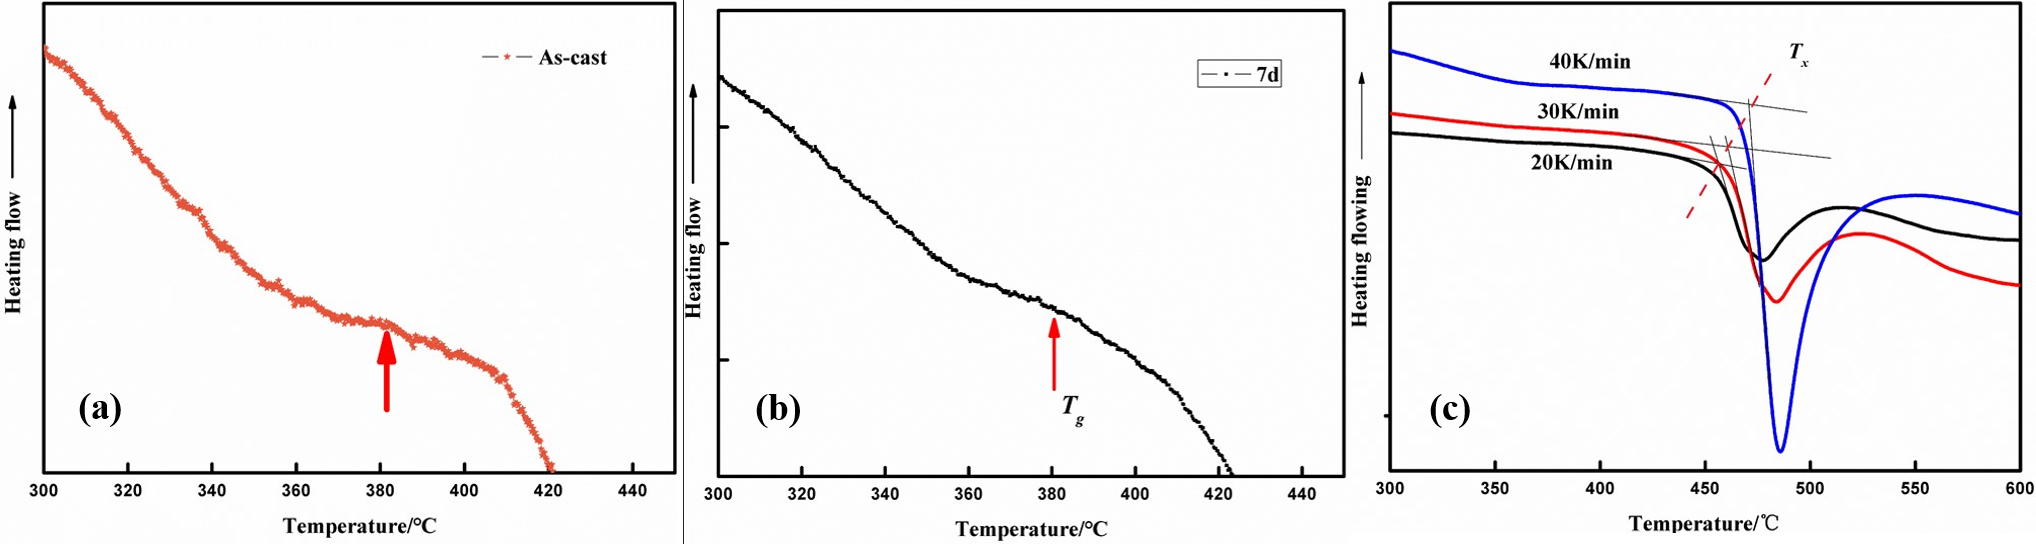


**Figure S2.** Enlarged DSC curves of Figure 4a (**a**) as-cast and (**b**) 1 week, (**c**) 1 week with different heat rate.


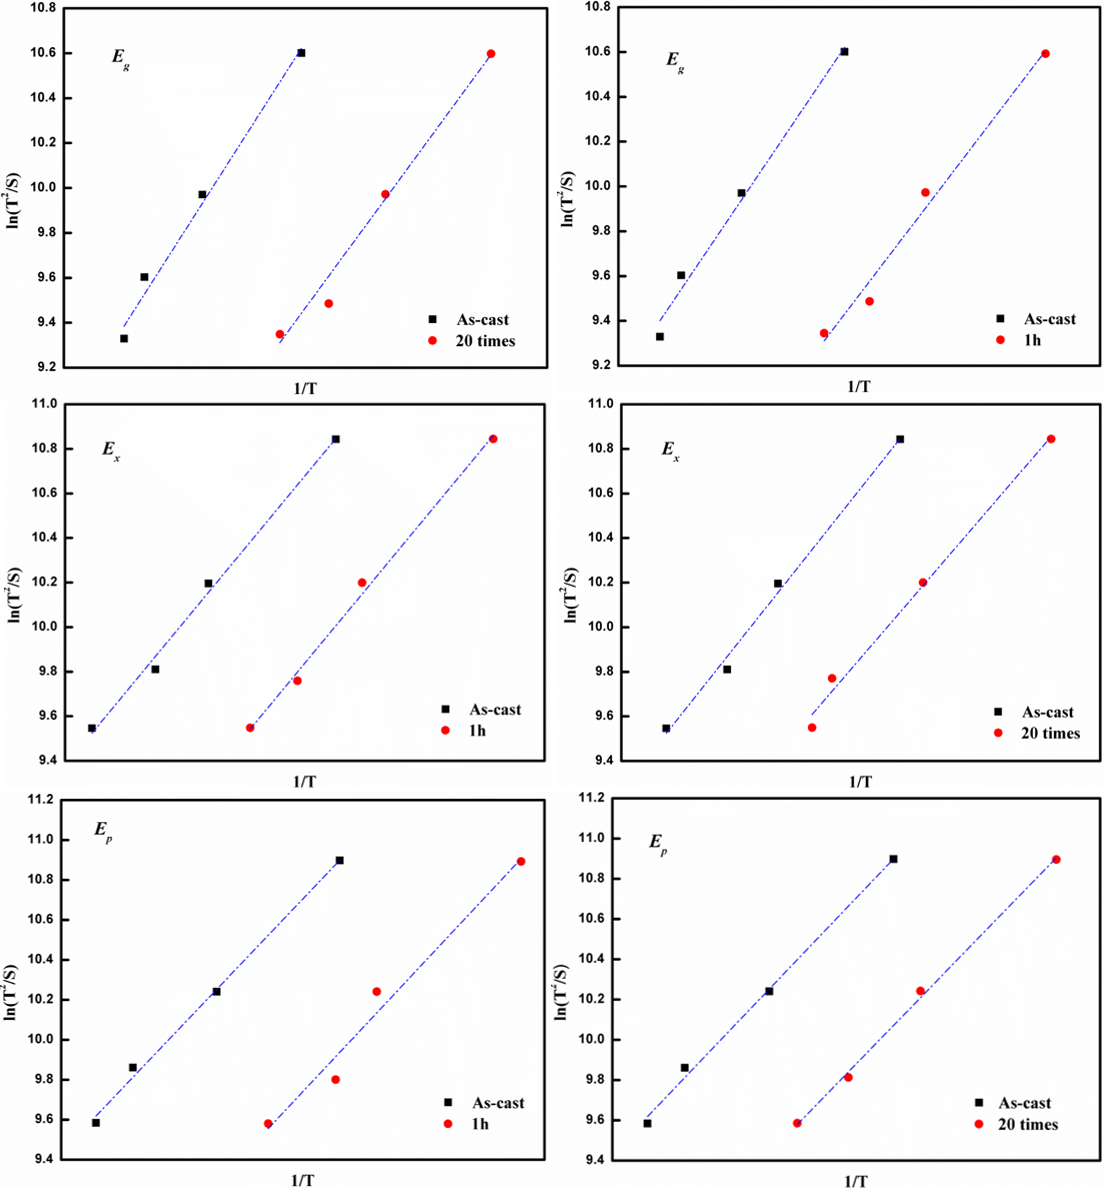


**Figure S3.** ln(*T*2/β) vs. 1/*T*. the activation energy near *Tg*, *Tx* and *Tp* with different cryogenic cycling treatment.


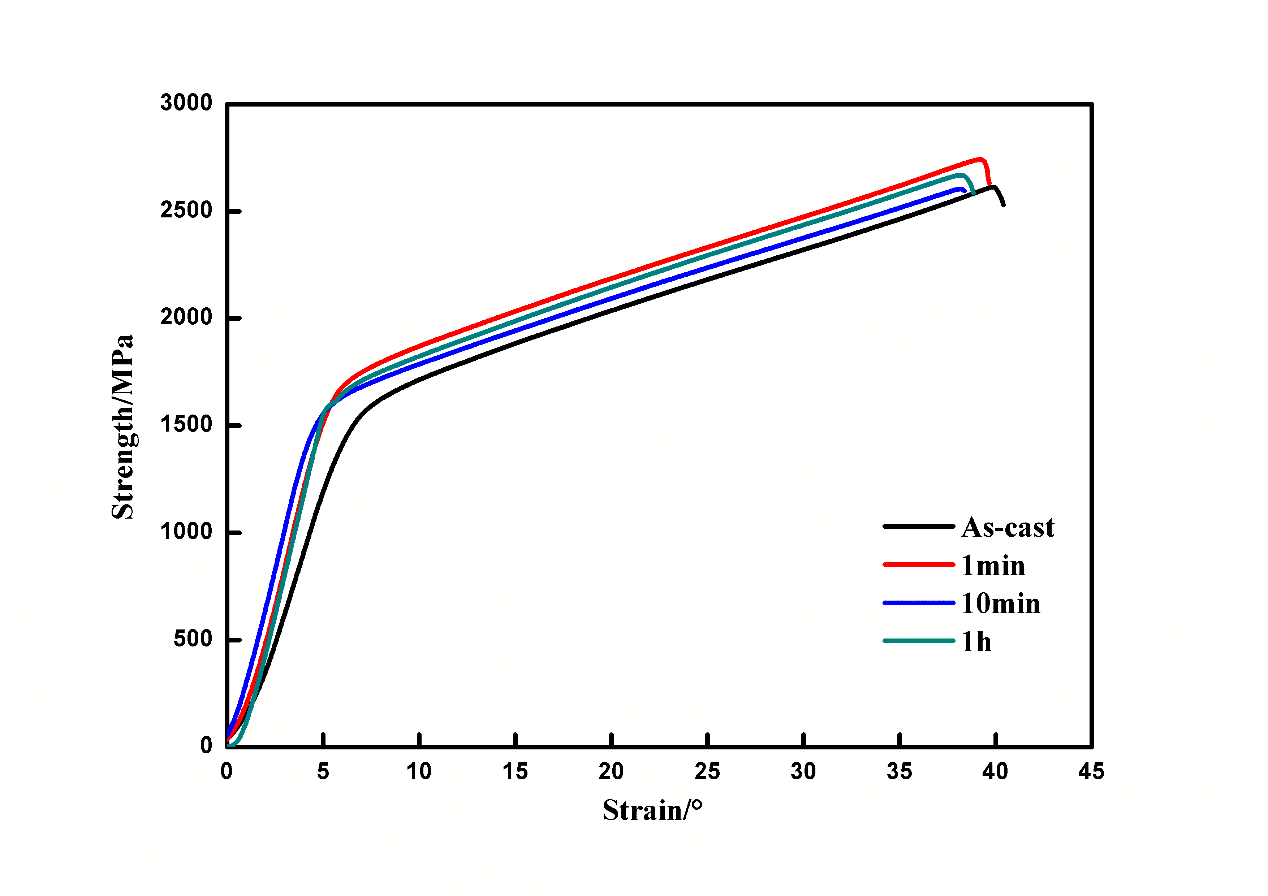


**Figure S4.** Stress-strain curves after 1-cycle treatment with different annealing time.


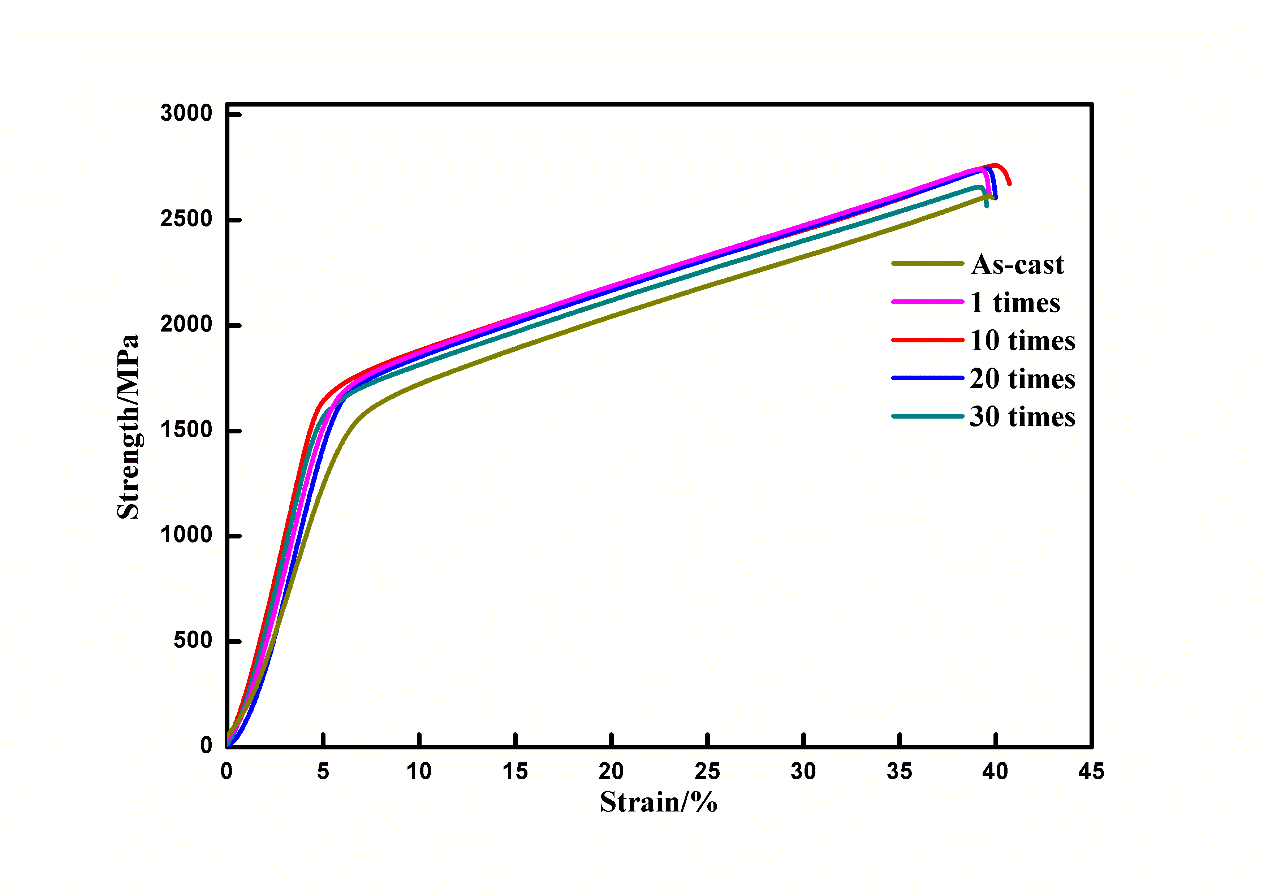


**Figure S5.** Stress-strain curves after 1-min treatment with different cycle.

**Table S1.** Thermal parameters determined from different thermal cycling treatments (20 °C/min).

| **Samples** | ***Tg* (°C)** | ***Tx* (°C)** | ***Tp* (°C)** | ***Tm* (°C)** | **Δ*T* (°C)** | **Δ*H* (J/g)** |
| --- | --- | --- | --- | --- | --- | --- |
| As-cast | 381 ± 1 | 459 ± 2 | 475 ± 1 | 688 ± 2 | 78 ± 1 | −31.14 |
| 1 min (1 times) | 380 ± 2 | 458 ± 1 | 474 ± 1 | 685 ± 2 | 78 ± 1 | −29.91 |
| 10 min | 381 ± 1 | 460 ± 1 | 474 ± 2 | 685 ± 2 | 79 ± 1 | −30.36 |
| 1 h | 381 ± 1 | 460 ± 1 | 475 ± 1 | 687 ± 1 | 79 ± 1 | −31.02 |
| 3 h | 381 ± 1 | 457 ± 1 | 473 ± 1 | 685 ± 2 | 77 ± 2 | −29.19 |
| 1 w | 381 ± 1 | 453 ± 1 | 477 ± 1 | 695 ± 2 | 72 ± 1 | −26.58 |
| 5 times | 380 ± 1 | 458 ± 2 | 474 ± 1 | 685 ± 1 | 78 ± 1 | −29.53 |
| 10 times | 380 ± 2 | 458 ± 1 | 474 ± 1 | 684 ± 1 | 78 ± 1 | −32.30 |
| 20 times | 381 ± 1 | 460 ± 1 | 476 ± 1 | 685 ± 2 | 79 ± 1 | −29.40 |
| 30 times | 381 ± 1 | 456 ± 1 | 474 ± 1 | 684 ± 1 | 75 ± 1 | −29.23 |
| 106 times | 380 ± 1 | 455 ± 2 | 474 ± 1 | 685 ± 1 | 78 ± 1 | −27.84 |

**Table S2.** All thermal kinetic parameters near glass transition temperature.

| **Samples** | **Parameters** | **Kissinger Method** | **Ozawa Method** |
| --- | --- | --- | --- |
| As-cast | ΔE (kJ/mol) | 142 | 144 |
| *v*0 (s−1) | 2.32 × 1011 |  |
| 1 h | ΔE (kJ/mol) | 149 | 142 |
| *v*0 (s−1) | 3.03 × 1011 |  |
| 1 w | ΔE (kJ/mol) | 126 | 130 |
| *v*0 (s−1) | 0.63 × 1011 |  |

**Table S3.** All thermal kinetic parameters near beginning crystallization temperature.

| **Samples** | **Parameters** | **Kissinger Method** | **Ozawa Method** |
| --- | --- | --- | --- |
| As-cast | ΔE (KJ/mol) | 179 | 174 |
| *v* 0 (s−1) | 3.16 × 1012 |  |
| 1 h | ΔE (KJ/mol) | 182 | 184 |
| *v* 0 (s−1) | 3.43 × 1012 |  |
| 1 w | ΔE (KJ/mol) | 183 | 185 |
| *v* 0 (s−1) | 1.48 × 1012 |  |

**Table S4.** The activation energy after different treatment.

|  | **As-Cast** | **20 Times** | **1 h** | **1 w** |
| --- | --- | --- | --- | --- |
| *Eg* | 143 | 143 | 145 | 128 |
| *Ex* | 176 | 172 | 183 | 184 |
| *Ep* | 227 | 215 | 217 | 377 |

**Table S5.** Mechanical parameters after 1-min treatment with different cycles.

| **Cycling Times** | **0** | **1** | **10** | **20** | **30** |
| --- | --- | --- | --- | --- | --- |
| E (GPa) | 29.5 | 36.1 | 39.9 | 38.1 | 38.9 |
| σ0.2 (MPa) | 1358 | 1558 | 1599 | 1497 | 1510 |
| ε*p*% | 34.14 | 33.92 | 35.27 | 34.25 | 34.47 |

**Table S6.** Mechanical parameters after 1-cycle treatment after different annealing time.

| **Annealing Time** | **0** | **1 min** | **10 min** | **1 h** |
| --- | --- | --- | --- | --- |
| E (GPa) | 29.5 | 36.1 | 36.2 | 37.8 |
| σ0.2 (MPa) | 1358 | 1558 | 1487 | 1591 |
| ε*p*% | 34.14 | 33.92 | 33.63 | 32.86 |

**Table S7.** The heat release Δ*H* after different treatment.

| **Cycling Times** | **0** | **1** | **5** | **10** | **20** | **30** | **106** |
| --- | --- | --- | --- | --- | --- | --- | --- |
| Area | 0.25132 | 0.21136 | 0.10957 | 0.12258 | 0.26519 | 0.06561 | 0.09179 |
| Beginning temperature/°C | 317.76800 | 311.46301 | 308.19400 | 303.22699 | 318.98999 | 315.2240 | 316.78000 |
| Ending temperature/°C | 382.43000 | 383.83301 | 385.98801 | 380.35999 | 375.80200 | 380.4240 | 380.38000 |
